# Supplementary material
Source: HighWire-hosted journal article supplement (https://rmdopen.bmj.com/content/9/1/e002787)
Supplement: inline-supplementary-material-1 [file inline-supplementary-material-1.pdf]

**Supplemental Figure S1.**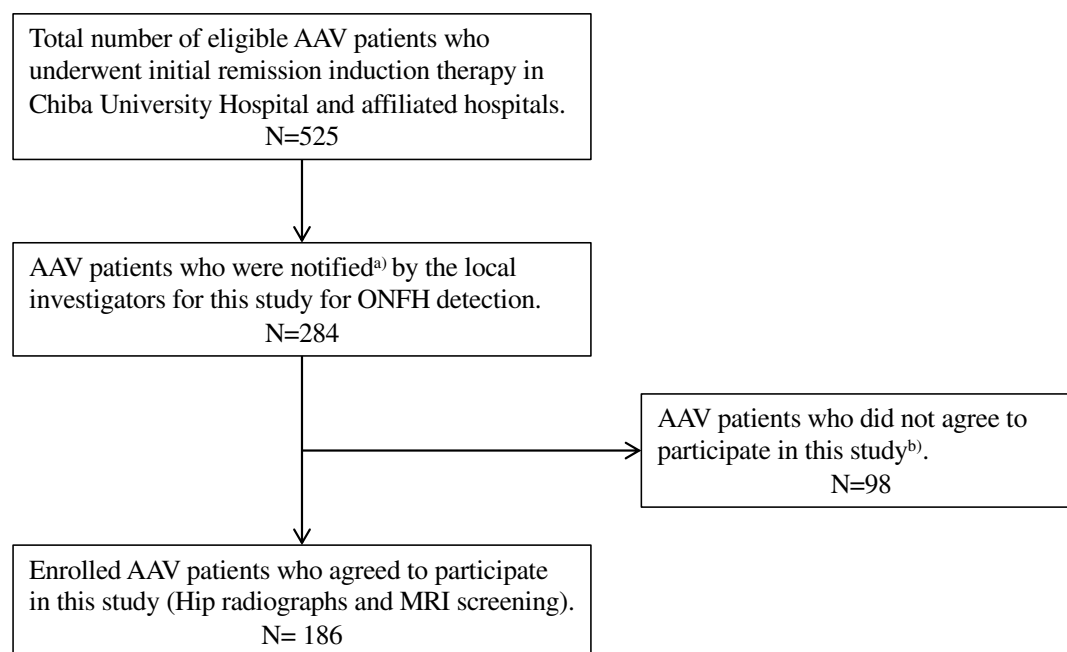**Supplemental Figure S1. Flow chart of AAV patient enrollment for ONFH detection.**

<sup>a)</sup> Patient notification of this study depended on each investigator.

<sup>b)</sup> The reasons for declining participation were lack of time to visit hospitals, the long distance to the hospitals, and the additional expense for an MRI, even in support of the health insurance system. In addition, because the majority of AAV patients were elderly, many patients hesitated to make extra visits to hospitals during the COVID-19 pandemic, which had a significant impact on patient enrollment.
